# Supplementary material for: Concomitant Immunosuppressive Therapy Use in Eculizumab-Treated Adults With Generalized Myasthenia Gravis During the REGAIN Open-Label Extension Study
Source: PubMed Central journal article supplement (PMC7732596; doi:10.3389/fneur.2020.556104), 2020-11-24
Supplement: Data_Sheet_2.pdf [file Data_Sheet_2.pdf]

**Appendix 2: REGAIN and open-label extension study sites, ethics committee/institutional review board information**

| <b>Study site</b>                                                                      | <b>Ethics committee/institutional review board (IRB)</b>                                                                                                                    |
|----------------------------------------------------------------------------------------|-----------------------------------------------------------------------------------------------------------------------------------------------------------------------------|
| Instituto de Investigaciones Neurológicas Raúl Carrea (FLENI), Buenos Aires, Argentina | Comite de Etica en Investigaciones Biomedicas, Montañeses 2325, Ciudad Autonoma Buenos Aires, Buenos Aires C1428AQK, Argentina                                              |
| Hospital Italiano de Buenos Aires, Buenos Aires, Argentina                             | Comité de Ética de Protocolos de Investigación, (CEPI), Juan. D Perón 4190/4192, C.A.B.A, Buenos Aires C1199AB/C1181ACH, Argentina                                          |
| Algemeen Ziekenhuis Sint-Lucas – Campus Sint-Lucas, Ghent, Belgium                     | Ethisch Comité Universitair Ziekenhuis Antwerpen, Wilrijkstraat 10, 2650 Edegem, Belgium                                                                                    |
|                                                                                        | Commissie Medische Ethiek Algemeen Ziekenhuis Sint-Lucas, Groenebriel 1, 9000 Gent, Belgium                                                                                 |
|                                                                                        | Commissie Medische Ethiek van de Universitaire Ziekenhuizen K.U. Leuven, Campus Gasthuisberg E330, Herestraat 49, 3000 Leuven, Belgium                                      |
| Universitair Ziekenhuis Antwerpen, Edegem, Antwerp, Belgium                            | Ethisch Comité Universitair Ziekenhuis Antwerpen, Wilrijkstraat 10, 2650 Edegem, Belgium                                                                                    |
|                                                                                        | Commissie Medische Ethiek Algemeen Ziekenhuis Sint-Lucas, Groenebriel 1, 9000 Gent, Belgium                                                                                 |
|                                                                                        | Commissie Medische Ethiek van de Universitaire Ziekenhuizen K.U. Leuven, Campus Gasthuisberg E330, Herestraat 49, 3000 Leuven, Belgium                                      |
| Universitaire Ziekenhuizen Leuven, Leuven, Belgium                                     | Ethisch Comité Universitair Ziekenhuis Antwerpen, Wilrijkstraat 10, 2650 Edegem, Belgium                                                                                    |
|                                                                                        | Commissie Medische Ethiek Algemeen Ziekenhuis Sint-Lucas, Groenebriel 1, 9000 Gent, Belgium                                                                                 |
|                                                                                        | Commissie Medische Ethiek van de Universitaire Ziekenhuizen K.U. Leuven, Campus Gasthuisberg E330, Herestraat 49, 3000 Leuven, Belgium                                      |
| Faculdade de Medicina do ABC, Santo André, Brazil                                      | Comité de Etica em Pesquisa da Faculdade de Medicinina do ABC, Avenida Lauro Gomes, 2000, Santo André, Sao Paulo 09060-870, Brasil                                          |
|                                                                                        | Comissao Nacional de Etica em Pesquisa, Sepn 510 Norte, Bloco A 1º Subsolo, Edifício, Ex-Inan - Unidade II - Ministério da Saúde, Asa Norte Brasilia , DF 70750-521, Brasil |
|                                                                                        | SRTV 701, Via W 5 Norte, lote D, Edifício, PO 700, 3º andar, Asa Norte, CEP:70719-040, Brasilia/DF                                                                          |

|                                                                                                 |                                                                                                                                                                             |
|-------------------------------------------------------------------------------------------------|-----------------------------------------------------------------------------------------------------------------------------------------------------------------------------|
| Fundação Faculdade Regional de Medicina de São José do Rio Preto, São José do Rio Preto, Brazil | CEP da Faculdade de Medicina de São José do Rio Preto – FAMERP, Av. Brigadeiro Faria Lima, 5416, São José do Rio Preto, Sao Paulo 15090-000, Brasil                         |
|                                                                                                 | Comissao Nacional de Etica em Pesquisa, Sepn 510 Norte, Bloco A 1º Subsolo, Edifício, Ex-Inan - Unidade II - Ministério da Saúde, Asa Norte Brasilia , DF 70750-521, Brasil |
|                                                                                                 | SRTV 701, Via W 5 Norte, lote D, Edifício, PO 700, 3º andar, Asa Norte, CEP: 70719-040, Brasilia/DF                                                                         |
| Hospital Mãe de Deus, Porto Alegre, Brazil                                                      | Comitê de Ética em Pesquisa em Seres, Humanos Associação Educadora São Carlos – Hospital Mae de Deus, Rua José de Alencar, 286 Porto Alegre, RS, 90880-480, Brasil          |
|                                                                                                 | Comissao Nacional de Etica em Pesquisa, Sepn 510 Norte, Bloco A 1º Subsolo, Edifício, Ex-Inan - Unidade II - Ministério da Saúde, Asa Norte, Brasilia, DF 70750-521, Brazil |
|                                                                                                 | SRTV 701, Via W 5 Norte, lote D, Edifício, PO 700, 3º andar, Asa Norte, CEP: 70719-040, Brasilia/DF                                                                         |
| Universidade Federal de São Paulo [UNIFESP], São Paulo, Brazil                                  | CEP da Universidade Federal de São Paulo/Hospital São Paulo, Rua Botucatu, 572 - 1º andar, São Paulo, 04023-062, Brasil                                                     |
|                                                                                                 | Comissao Nacional de Etica em Pesquisa, Sepn 510 Norte, Bloco A 1º Subsolo, Edifício, Ex-Inan - Unidade II - Ministério da Saúde, Asa Norte Brasilia , DF 70750-521, Brasil |
|                                                                                                 | SRTV 701, Via W 5 Norte, lote D, Edifício, PO 700, 3º andar, Asa Norte, CEP: 70719-040, Brasilia/DF                                                                         |
| University of Alberta Hospital, Edmonton, AB, Canada                                            | University of Alberta Research Ethics Office, 308 Campus Tower, 8625 – 112 St. NW, Edmonton, Alberta T6G 1K8, Canada                                                        |
| Fakultní nemocnice Brno, Brno, Czech Republic                                                   | Eticka komise Fakultini nemocnice Brno, Jihlavská 20, 625 00 Brno, Czech Republic                                                                                           |
| Fakultní nemocnice Ostrava, Ostrava, Czech Republic                                             | Eticka komise Fakultini nemocnice Ostrava, 17. listopadu 1790/5, 708 52 Ostrava-Poruba, Czech Republic                                                                      |
|                                                                                                 | Eticka komise Fakultini nemocnice Brno, Jihlavská 20, 625 00 Brno, Czech Republic                                                                                           |
| Všeobecná fakultní nemocnice v Praze, Praze, Czech Republic                                     | Eticka komise Vseobecne fakultni nemocnice v Praze, Na Bojisti 1, III. patro 128 08, Praha 2, Czech Republic                                                                |
|                                                                                                 | Eticka komise Fakultini nemocnice Brno, Jihlavská 20, 625 00 Brno, Czech Republic                                                                                           |
| Århus Universitetshospital, Aarhus, Denmark                                                     | De Videnskabsetiske Komitéer for Region, Hovedstaden, Kongens Vænge 2, Hillerød, 3400, Denmark                                                                              |
| Rigshospitalet, Copenhagen, Denmark                                                             | De Videnskabsetiske Komitéer for Region, Hovedstaden, Kongens Vænge 2, Hillerød, 3400, Denmark                                                                              |

|                                                                               |                                                                                                                                             |
|-------------------------------------------------------------------------------|---------------------------------------------------------------------------------------------------------------------------------------------|
| Neuro NEO Oy, Turku, Finland                                                  | Tukija, Valvira, Lintulahdenkuja, P.O. Box 210, Helsinki, FI-00531, Finland                                                                 |
| Jahn Ferenc Dél-Pesti Kórház, Budapest, Hungary                               | Medical Research Council Ethics Committee for Clinical Pharmacology, Széchenyi István tér 7-8, Budapest, H-1051, Hungary                    |
| University of Szeged, Albert Szent-Györgyi Health Center, Szeged, Hungary     | Medical Research Council Ethics Committee for Clinical Pharmacology, Széchenyi István tér 7-8, Budapest, H-1051, Hungary                    |
| Azienda Ospedaliera Sant'Andrea – Università di Roma La Sapienza, Rome, Italy | Comitato Etico Azienda Policlinico Umberto I, Viale del Policlinico 155, Roma, 00161, Italy                                                 |
| Azienda Ospedaliera Universitaria “Federico II”, Naples, Italy                | Comitato Etico per le attività biomediche “Carlo Romano” Università degli Studi di Napoli Federico II, Via Pansini, 5, Napoli, 80131, Italy |
| Fondazione IRCCS Istituto Neurologico Carlo Besta, Milano, Italy              | Comitato Etico Fondazione IRCCS Istituto, Neurologico “Carlo Besta”, Via Celoria 11, Milano, 20133, Italy                                   |
| Policlinico Universitario Agostino Gemelli, Rome, Italy                       | Comitato Etico Univ. Cattolica del Sacro Cuore, Policlinico A. Gemelli, Largo Agostino Gemelli, 8, Roma, 00168, Italy                       |
| Umberto I Policlinico di Roma – Università di Roma La Sapienza, Rome, Italy   | Comitato Etico dell’ Università Sapienza, Viale del Policlinico, 155, Roma, 00161, Italy                                                    |
| Chiba University Hospital, Chiba, Japan                                       | Chiba University Hospital IRB, Chuo-ku Inohana 1-8-1, Chiba-shi, Chiba-Ken 260-8677, Japan                                                  |
| Kyushu University Hospital, Fukuoka                                           | Kyushu University Hospital IRB, Higashi-ku Maidashi 3-1-1, Fukuoka-shi, Fukuoka-Ken 812-8582, Japan                                         |
| Hanamaki General Hospital, Hanamaki, Japan                                    | General Hanamaki Hospital IRB, Kajo-machi 4-28, Hanamaki-shi, Iwate-Ken 025-0075, Japan                                                     |
| Kinki University Hospital, Osaka, Japan                                       | Kindai University Hospital IRB, Onohigashi 377-2, Osakasayama-shi, Osaka-Fu 589-8511, Japan                                                 |
| Nagasaki University Hospital, Nagasaki, Japan                                 | Nagasaki University Hospital IRB, Sakamoto 1-7-1, Nagasaki-shi, Nagasaki-Ken 852-8501, Japan                                                |
| National Hospital Organization Sendai Medical Center, Sendai, Japan           | NHO Sendai Medical Center IRB, Miyagino-ku Miyagino 2-8-8, Sendai-shi, Miyagi-Ken 983-8520, Japan                                           |
| Osaka University Hospital, Osaka, Japan                                       | Osaka University Hospital IRB, Yamadaoka 2-15, Suita-shi, Osaka-Fu 565-0871, Japan                                                          |
| Sapporo Medical University Hospital, Chuo-ku, Sapporo, Japan                  | Sapporo Medical University Hospital IRB, 291, Minami 1jo Nishi 16-chome, Chuo-ku, Sapporo-shi, Hokkaido 060-8543, Japan                     |
| Korea University Anam Hospital, Seoul, Republic of Korea                      | IRB of Korea University Anam Hospital, 73, Inchon-ro, Seongbuk-gu, Seoul, 136-705, Korea                                                    |

|                                                                                                          |                                                                                                                                                                                  |
|----------------------------------------------------------------------------------------------------------|----------------------------------------------------------------------------------------------------------------------------------------------------------------------------------|
| Samsung Medical Center, Seoul, Republic of Korea                                                         | IRB of Samsung Medical Center, 81, Irwon-ro, Gangnam-gu, Seoul, 135-710, Korea                                                                                                   |
| Seoul National University Seoul Metropolitan Government Boramae Medical Center, Seoul, Republic of Korea | IRB of Seoul Metropolitan Government, Seoul National University Boramae Medical Center, 20, Boramae-ro 5-gil, Dongjak-gu, Seoul, 07061, Korea                                    |
| Severance Hospital, Yonsei University Health System, Seoul, Republic of Korea                            | IRB of Severance Hospital, Yonsei University, Health System, 50-1, Yonsei-ro, Seodaemun-gu, Seoul, 03772, Korea                                                                  |
| Academisch Medisch Centrum, Amsterdam, The Netherlands                                                   | Medisch Ethische Toetsingscommissie (MEC), Academisch Medisch Centrum Amsterdam, Kamernummer: E2-170/172, Meibergdreef 9, 1105 AZ Amsterdam, The Netherlands                     |
| Hospital Universitari de Bellvitge, Barcelona, Spain                                                     | CEIC Hospital Universitari Vall d'Hebron, Edificio metrno infntil planta 13, Paseo Vall d'Hebron 119-129, Barcelona 08035, Spain                                                 |
|                                                                                                          | Comite Etico de Investigacion Clinica (CEIC), Hospital Universitari de Bellvitge, Edifici Unitat de Recerca Feixa Llarga, s/n L'Hospitalet de Llobregat, Barcelona, 08907, Spain |
| Hospital Universitario La Paz, Madrid, Spain                                                             | CEIC Hospital Universitari La Paz, Paseo de la Castellana, 261, Hospital General – Planta 8 <sup>a</sup> , 28046, Madrid, Spain                                                  |
|                                                                                                          | CEIC Hospital Universitari de Bellvitge, Edifici Unitat de Recerca, Feixa Llarga, s/n, L'Hospitalet de Llobregat, Barcelona 08907, Spain                                         |
| Hospital Universitari Vall d'Hebron, Barcelona, Spain                                                    | CEIC Hospital Universitari Vall d'Hebron, Edificio metrno infntil planta 13, Paseo Vall d'Hebron 119-129, Barcelona 08035, Spain                                                 |
|                                                                                                          | CEIC Hospital Universitari de Bellvitge, Edifici Unitat de Recerca, Feixa Llarga, s/n, L'Hospitalet de Llobregat, Barcelona 08907, Spain                                         |
| Hospital Sant Pau, Universitat Autònoma de Barcelona, Spain                                              | Hospital de la Santa Creu I Sant Pau, Servicio de Farmacología Clínica – Pabellón, 18Av. Sant Antoni M <sup>a</sup> Claret, 167, Barcelona, 08025, Spain                         |
|                                                                                                          | CEIC Hospital Universitari de Bellvitge, Edifici Unitat de Recerca, Feixa Llarga, s/n, L'Hospitalet de Llobregat, Barcelona 08907, Spain                                         |
| Karolinska University Hospital, Stockholm, Sweden                                                        | Regionala etikprövningsnämnden i Stockholm, Karolinska institutet/Solna, Nobels vägn 9, plan 3D, SE-171 65, Stockholm, Sweden                                                    |
|                                                                                                          | Etikprövningsmyndigheten, Box 2110, 750 02 Uppsala, Sweden                                                                                                                       |
| Dokuz Eylül University Faculty of Medicine, Izmir, Turkey                                                | Ege Üniversitesi Tıp Fakültesi Klinik, Araştırmalar Etik Kurulu, Ege Üniversitesi Tıp Fakültesi Dekanlığı 2, Kat Erzene Ankara Caddesi, Bornova 35100, Izmir, Turkey             |
|                                                                                                          | Hacettepe Üniversitesi, Klinik Araştırmalar Etik, Kurulu Sıhhiye-Altındağ, Ankara/Turkey 06100                                                                                   |

|                                                                                                                  |                                                                                                                                                                         |
|------------------------------------------------------------------------------------------------------------------|-------------------------------------------------------------------------------------------------------------------------------------------------------------------------|
| Hacettepe University Faculty of Medicine,<br>Ankara, Turkey                                                      | Ege Üniversitesi Tıp Fakültesi Klinik, Araştırmalar Etik Kurulu, Ege Üniversitesi Tıp Fakültesi<br>Dekanlığı 2, Kat Erzene Ankara Caddesi, Bornova 35100, Izmir, Turkey |
|                                                                                                                  | Hacettepe Üniversitesi, Klinik Araştırmalar Etik, Kurulu Sıhhiye-Altındağ, Ankara/Turkey<br>06100                                                                       |
| Kocaeli University Faculty of Medicine,<br>Kocaeli, Turkey                                                       | Ege Üniversitesi Tıp Fakültesi Klinik, Araştırmalar Etik Kurulu, Ege Üniversitesi Tıp Fakültesi<br>Dekanlığı 2, Kat Erzene Ankara Caddesi, Bornova 35100, Izmir, Turkey |
|                                                                                                                  | Hacettepe Üniversitesi, Klinik Araştırmalar Etik, Kurulu Sıhhiye-Altındağ, Ankara/Turkey<br>06100                                                                       |
| Ondokuz Mayıs University Medical<br>Faculty, Atakum/Samsun, Turkey                                               | Ege Üniversitesi Tıp Fakültesi Klinik, Araştırmalar Etik Kurulu, Ege Üniversitesi Tıp Fakültesi<br>Dekanlığı 2, Kat Erzene Ankara Caddesi, Bornova 35100, Izmir, Turkey |
|                                                                                                                  | Hacettepe Üniversitesi, Klinik Araştırmalar Etik, Kurulu Tıp Fakültesi Dekanlık Katı Sıhhiye-<br>Altındağ, Ankara/Turkey 06100                                          |
| King's College Hospital, London, UK                                                                              | NRES Committee East Midlands – Leicester, The Old Chapel - Royal Standard Place,<br>Nottingham, NG1 6FS, UK                                                             |
| Queen Elizabeth Neuroscience Centre,<br>(Wellcome Trust CRF, University Hospitals<br>Birmingham), Birmingham, UK | NRES Committee East Midlands – Leicester, The Old Chapel, Royal Standard Place,<br>Nottingham, NG1 6FS, UK                                                              |
| The Walton Centre, Liverpool, UK                                                                                 | The Walton Centre NHS Foundation Trust, Clinical Trials Unit, 1st Floor, Lower Lane,<br>Fazakerley Liverpool, Merseyside L9 7LJ, UK                                     |
|                                                                                                                  | NRES Committee East Midlands – Leicester, The Old Chapel, Royal Standard Place,<br>Nottingham, NG1 6FS, UK                                                              |
| Brigham and Women's Hospital, Boston,<br>MA, USA                                                                 | Partners Human Research Committee, 399 Revolution Dr, Suite 710, Somerville, MA 02145,<br>USA                                                                           |
| University at Buffalo Jacobs School of<br>Medicine and Biomedical Sciences, Buffalo,<br>NY, USA                  | Health Sciences IRB, 3435 Main Street - 150 Parker Hall, Buffalo, NY 14214, USA                                                                                         |
| California Pacific Medical Center, San<br>Francisco, CA, USA                                                     | Western IRB (WIRB), 1019 39th Avenue SE Suite 120, Puyallup, WA 98374-2115, USA                                                                                         |
| Carolinas HealthCare System, Charlotte,<br>NC, USA                                                               | Copernicus Group IRB, 1 Triangle Drive, Suite 100, Durham, NC 27713, USA                                                                                                |
|                                                                                                                  | Advarra IRB (Chesapeake IRB), 6940 Columbia Gateway Drive, Suite 110, Columbia, MD<br>21046, USA                                                                        |

|                                                                                    |                                                                                                                                   |
|------------------------------------------------------------------------------------|-----------------------------------------------------------------------------------------------------------------------------------|
| Duke University Health System, Durham, NC, USA                                     | Duke University Health System IRB, 2424 Erwin Road, Suite 405, Campus Box 2712, Durham, NC 27705, USA                             |
| Indiana University, Indianapolis, IN, USA                                          | Indiana University IRB, 980 Lockfield Village, Third Floor, Indianapolis, IN 46202, USA                                           |
| Johns Hopkins University School of Medicine, Baltimore, MD, USA                    | JHM Office of Human Subjects Research – IRBs, 1620 McElderry Street, Baltimore, MD 21205-1911, USA                                |
| Lahey Hospital and Medical Center – Burlington, Burlington, MA, USA                | Lahey Hospital and Medical Center IRB, 41 Mall Road, Burlington, MA 01805, USA                                                    |
| Las Vegas Clinic, Las Vegas, NV, USA                                               | Copernicus Group IRB, 500 CentreGreen Way, Suite 200, Cary, NC 27513, USA                                                         |
| Ohio State University Wexner Medical Center, Columbus, OH, USA                     | Western IRB (WIRB), 1019 39th Avenue SE Suite 120, Puyallup, WA 98374-2115, USA                                                   |
| Oregon Health and Science University, Portland, OR, USA                            | Oregon Health and Science University IRB, 3181 SW Sam Jackson Park Rd, Portland, OR 97239, USA                                    |
| Southern Illinois University School of Medicine, Springfield, IL, USA              | Springfield Committee For Research Involving Human Subjects, 201 East Madison Street, Springfield, IL 62702, USA                  |
| Stanford University School of Medicine, Stanford, CA, USA                          | Stanford IRB Research Compliance Office, 3000 El Camino Real, Five Palo Square, 4th Floor, Palo Alto, CA 94306, USA               |
| The University of Texas Health Science Center at San Antonio, San Antonio, TX, USA | The University of Texas Health Science Center, San Antonio IRB, 7703 Floyd Curl Drive, San Antonio, TX 78229, USA                 |
| The University of Texas Southwestern Medical Center, Dallas, TX, USA               | University of Texas Southwestern Medical Center IRB, 5323 Harry Hines Blvd., Dallas, TX 75390, USA                                |
| University of Alabama at Birmingham Medicine, Birmingham, AL, USA                  | Western IRB (WIRB), 1019 39th Avenue SE Suite 120, Puyallup, WA 98374-2115, USA                                                   |
| University of California-Irvine, Irvine, CA, USA                                   | IRB – Office of Research Administration, University of California, Irvine, 141 Innovation, Suite #250, Irvine, CA 92697-7600, USA |
| University of California-San Francisco-Fresno, CA, USA                             | Community Medical Centers IRB, 155 N. Fresno Street, Suite 290, Fresno, CA 93701, USA                                             |
| University of Florida Health Jacksonville, Jacksonville, FL, USA                   | Western IRB (WIRB), 1019 39th Avenue SE Suite 120, Puyallup, WA 98374-2115, USA                                                   |
| University of Iowa Children's Hospital, Iowa City, IA, USA                         | Western IRB (WIRB), 1019 39th Avenue SE Suite 120, Puyallup, WA 98374-2115, USA                                                   |

|                                                                   |                                                                                                                                                       |
|-------------------------------------------------------------------|-------------------------------------------------------------------------------------------------------------------------------------------------------|
| University of Kansas Medical Center, Kansas City, KS, USA         | Human Subjects Committee University of Kansas Medical Center, 3901 Rainbow Boulevard, Kansas City, KS 66160, USA                                      |
| University of Maryland Medical Center, Baltimore, MD, USA         | University of Maryland, Baltimore IRB, 800 W. Baltimore Street, Suite 100, Baltimore, MD 21201, USA                                                   |
| University of Miami Miller School of Medicine, Miami, FL, USA     | University of Miami IRBs Human Subject Research Office, 1400 NW 10th Avenue, Suite 1200A, Miami, FL 33136, USA                                        |
| University of North Carolina Medical Center, Chapel Hill, NC, USA | Office of Human Research Ethics, University of North Carolina at Chapel Hill, Medical School Building 52, CB# 7097, Chapel Hill, NC 27599, USA        |
| University of South Florida, Tampa, FL, USA                       | Western IRB (WIRB), 1019 39th Avenue SE Suite 120, Puyallup, WA 98374-2115, USA                                                                       |
| University of Southern California, Los Angeles, CA, USA           | USC Health Sciences IRB, 1200 North State Street, Suite 4700, Los Angeles, CA 90033, USA                                                              |
| University of Vermont Medical Center, Burlington, VT, USA         | University of Vermont Committee on Human Research in the Medical Sciences, 213 Waterman Building, 85 South Prospect Street, Burlington, VT 05405, USA |
| University of Washington, Seattle, WA, USA                        | Western IRB (WIRB), 1019 39th Avenue SE Suite 120, Puyallup, WA 98374-2115, USA                                                                       |
| Wesley Neurology Clinic, PC, Cordova, TN, USA                     | Copernicus Group IRB, 1 Triangle Drive, Suite 100, Durham, NC 27713, USA                                                                              |
| Yale University, New Haven, CT, USA                               | Human Research Protection Program, 25 Science Park, 3 <sup>rd</sup> Floor, 150 Munson St., New Haven, CT 06520-8327, USA                              |
